# Supplementary material for: Technetium-99m-labeled rituximab for use as a specific tracer of sentinel lymph node biopsy: a translational research study
Source: PubMed Central journal article supplement (PMC5122431; doi:10.18632/oncotarget.9614), 2016-05-26
Supplement: oncotarget-07-38810-s001.pdf [file oncotarget-07-38810-s001.pdf]

## Technetium-99m-labeled rituximab for use as a specific tracer of sentinel lymph node biopsy: a translational research study

### SUPPLEMENTARY FIGURES

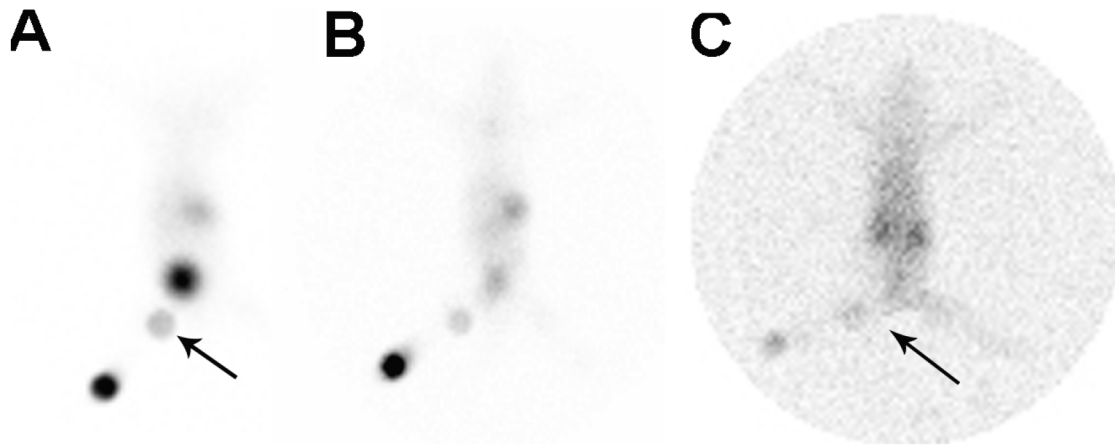

**Supplementary Figure S1:** A–C. Dynamic sentinel lymphoscintigraphy at 1, 4, and 24 h after intradermal injection of  $^{99m}\text{Tc}$ -IgG antibody in the rear pad of bal/c mice (Arrow: sentinel lymph node).

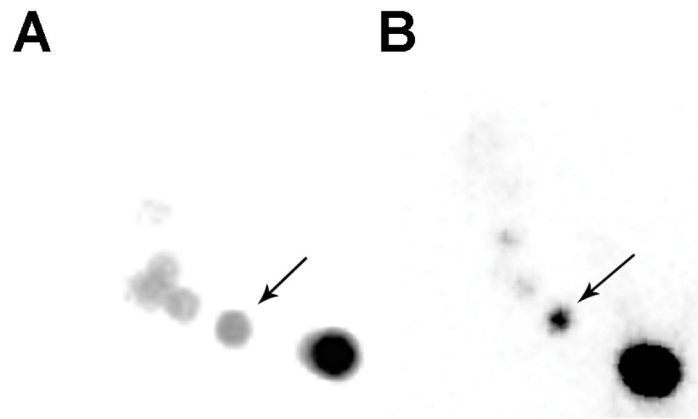

**Supplementary Figure S2: Dynamic sentinel lymphoscintigraphy after intradermal injection of  $^{99m}\text{Tc}$ -labeled dextran A. and  $^{99m}\text{Tc}$ -labeled sulfur colloid B. in bal/c mice. A chain of lymph nodes were visualized 30 min after injecting the radiotracer in the rear pad of bal/c mice. (Arrow: sentinel lymph node).**
